# Supplementary material
Source: publisher figshare collection journal article supplement (https://geolsoc.figshare.com/ndownloader/files/29018127)
Supplement: Supplementary file 1 [file 29018127]

**Supplementary Material for**

**Extension and early orogenic inversion along the basal detachment of a hyper-extended rifted margin: an example from the Central Pyrenees (France)**

Paul Angrand1,2*, Mary Ford1, Maxime Ducoux3,4, and Michel De Saint Blanquat2

1 CRPG-CNRS, UMR 7358, 15, rue Notre-Dame-des-Pauvres, 54501 Vandœuvre-les-Nancy, France  2 GET-OMP, Université de Toulouse, CNRS, IRD, 14 av. Edouard Belin, 31400 Toulouse, France
3 CSTJF, Total SA, Pau, France,
4 M&U sas, 38120 Saint-Égrève, France

**Supplementary Table 1:** RSCM temperatures of 14 North Pyrenean samples located in Figure 3.

**Supplementary Figure 1:** Original and high quality photograph of the samples presented in Figure 4.

**Supplementary Figure 2:** Original and high quality photograph of the samples presented in Figure 7.

**Supplementary Figure 3:** Original and high quality photograph of the samples presented in Figure 7.

**Supplementary Figure 4:** Original and high quality photograph of the samples presented in Figure 7.

**Supplementary Figure 5:** Original and high quality photograph of the samples presented in Figure 7.

**Supplementary Figure 6:** Original and high quality photograph of the samples presented in Figure 7.

**Supplementary Figure 7:** Original and high quality photograph of the samples presented in Figure 8.

**Supplementary Figure 8:** Original and high quality photograph of the samples presented in Figure 8.

**Supplementary Figure 9:** Original and high quality photograph of the samples presented in Figure 8.

**Supplementary Figure 10:** Original and high quality photograph of the samples presented in Figure 8.

References

Beyssac, O., Goffé, B., Chopin, C., & Rouzaud, J. N. (2002). Raman spectra of carbonaceous material in metasediments: a new geothermometer. Journal of metamorphic Geology, 20(9), 859-871.

Lahfid, A., Beyssac, O., Deville, E., Negro, F., Chopin, C., & Goffé, B. (2010). Evolution of the Raman spectrum of carbonaceous material in low‐grade metasediments of the Glarus Alps (Switzerland). Terra nova, 22(5), 354-360.
